# Supplementary material for: Biological Detoxification of the Inhibitors in Corncob Acid Hydrolysate Using Aspergillus niger
Source: MDPI journal article supplement (doi:10.3390/fermentation9090854), 2023-09-19
Supplement: s1 [file s1]

**Table S1.** The composition content of corn cob dilute acid hydrolysate before and after the biological detoxification using various quantities of *A. niger* M13 mycelial pellets.

| Inoculation amount | Time(h) | Glucose(g/L) | Xylose(g/L) | Arabinose(g/L) | Furfural(g/L) | HMF(g/L) | Acetic acid(g/L) |
|--------------------|---------|--------------|-------------|----------------|---------------|----------|------------------|
| 5%                 | 0 h     | 10.23        | 55.81       | 8.92           | 1.29          | 0.33     | 6.94             |
|                    | 288 h   | 0.48         | 0           | 2.86           | 0             | 0        | 0                |
| 10%                | 0 h     | 11.41        | 54.68       | 8.57           | 1.23          | 0.32     | 6.68             |
|                    | 288 h   | 0            | 0           | 0              | 0             | 0        | 0                |
| 15%                | 0 h     | 12.51        | 50.16       | 8.45           | 1.17          | 0.31     | 6.21             |
|                    | 288 h   | 0            | 0.138       | 0              | 0             | 0        | 0                |
| 20%                | 0 h     | 13.58        | 49.01       | 8.17           | 1.13          | 0.29     | 6.03             |
|                    | 288 h   | 0            | 0.37        | 0              | 0             | 0        | 0                |

**Table S2.** The composition content of corn cob dilute acid hydrolysate before and after the biological detoxification using various quantities of *A. niger* M13 spores.

| Spores number        | Time(h) | Glucose(g/L) | Xylose(g/L) | Arabinose(g/L) | Furfural(g/L) | HMF(g/L) | Acetic acid(g/L) |
|----------------------|---------|--------------|-------------|----------------|---------------|----------|------------------|
| $0.181 \times 10^8$  | 0 h     | 9.06         | 60.49       | 9.52           | 1.35          | 0.37     | 7.52             |
|                      | 240 h   | 0            | 0           | 0              | 0             | 0        | 0                |
| $0.4525 \times 10^8$ | 0 h     | 9.06         | 60.49       | 9.52           | 1.35          | 0.37     | 7.52             |
|                      | 240 h   | 0            | 0           | 0              | 0             | 0        | 0                |
| $0.905 \times 10^8$  | 0 h     | 9.06         | 60.49       | 9.52           | 1.35          | 0.37     | 7.52             |
|                      | 240 h   | 0            | 0           | 0              | 0             | 0        | 0                |
| $1.3575 \times 10^8$ | 0 h     | 9.06         | 60.49       | 9.52           | 1.35          | 0.37     | 7.52             |
|                      | 240 h   | 0            | 0           | 0              | 0             | 0        | 0                |

**Table S3.** The sugar and inhibitor concentration in corncob dilute acid hydrolysate within 24 hours of biological detoxification.

| Time | Glucose(g/L) | Xylose(g/L) | Arabinose(g/L) | Furfural(g/L) | HMF(g/L) | Acetic acid(g/L) |
|------|--------------|-------------|----------------|---------------|----------|------------------|
| 0    | 9.06         | 60.48       | 9.52           | 1.35          | 0.37     | 7.52             |
| 12   | 7.84         | 58.45       | 9.01           | 0             | 0.28     | 6.45             |
| 24   | 6.13         | 52.66       | 8.38           | 0             | 0        | 5.15             |
